# Supplementary material for: Template-free synthesis of hierarchical hollow V2O5 microspheres with highly stable lithium storage capacity
Source: Royal Society of Chemistry journal article supplement (doi:10.1039/c6ra25997a), 2017-01-01
Supplement: c6ra25997a1.pdf [file c6ra25997a1.pdf]

1

## Supporting information for

2 **Template-Free Synthesis of Hierarchical Hollow V<sub>2</sub>O<sub>5</sub>**

3 **Microspheres with Highly Stable Lithium Storage Capacity**

4 Hangkong Li,<sup>a</sup> Jiexi Wang,<sup>a,b</sup> Xiang Liu,<sup>c</sup> Qian Sun,<sup>c</sup> Aleksandra B. Djurišić,<sup>c</sup> Maohai

5 Xie,<sup>c</sup> Ying Mei,<sup>a</sup> Chuyang Y. Tang<sup>a</sup> and Kaimin Shih<sup>a,\*</sup>

6 *<sup>a</sup> Department of Civil Engineering, The University of Hong Kong, Pokfulam Road, Hong*

7 *Kong*

8 *<sup>b</sup> School of Metallurgy and Environment, Central South University, Changsha, Hunan*

9 *410083, China*

10 *<sup>c</sup> Department of Physics, The University of Hong Kong, Pokfulam Road, Hong Kong*

11

12

13

14

15

16

17

18

19

20 **Experimental section**————

\* Corresponding author. Tel.: +852-28591973; Fax: +852-25595337.

E-mail: kshih@hku.hk (K. Shih)

21 **Sample preparation:** In a typical procedure, 0.0125 mol  $V_2O_5$  (99.6%) were dissolved in  
22 75 mL of deionized water under vigorous stirring at room temperature for 30 mins, then  
23 0.025 mol citric acid (99.7%) was added. After 12 hours continuous stirring, a clear blue  
24 solution was obtained, which indicated the formation of  $VO(C_6H_6O_7)$  (0.33 M).<sup>1,2</sup> Finally,  
25 5 ml of as-prepared  $VO(C_6H_6O_7)$  solution was mixed with 13 ml isopropanol (IPA, AR) or  
26 ethylene glycol (EG, AR) before being transferred into a 25 mL Teflon-lined stainless  
27 steel autoclave and kept in an oven at 200°C for 24 h. For comparison, the vanadium  
28 sources were changed to  $VO(C_2O_4)$  (prepared from  $V_2O_5$  and  $H_2C_2O_4$ )<sup>3</sup> or  $V_2O_5$  sol  
29 (prepared from  $V_2O_5$  and  $H_2O_2$ )<sup>4</sup> solution while other conditional parameters were kept the  
30 same. To study the time- and concentration- dependent structural evolutions of the  
31 precursors, the samples with different reaction times (6 h, 12 h, 18 h, and 24 h) and  
32  $VO(C_6H_6O_7)$  concentrations (0.066 M, 0.11 M, 0.165 M, and 0.264 M) were also  
33 fabricated, respectively. The synthesized precursors (designated as P-IPA and P-EG for  
34 isopropanol ethylene glycol cases, respectively) from the solvothermal reaction were  
35 washed with deionized water three times and then dried using a freeze dryer. Finally, the  
36 hollow  $V_2O_5$  spheres were prepared by annealing the precursors at 350°C for 1 h with a  
37 heating rate of 1°C/min.

38 **Materials characterization:** The X-ray powder diffraction data were collect using a D8  
39 Advanced Diffractometer (Bruker AXS) operated at 40 kV and 40 mA with  $Cu K\alpha$   
40 radiation at room temperature. The Hitachi S-4800 scanning electron microscopy was  
41 applied for morphological observation and energy dispersive spectroscopy (EDS) mapping.  
42 Transmission electron microscopy (TEM) and high-resolution TEM (HRTEM) were  
43 performed on a FEI Tecnai G2 20 S-TWIN Scanning Transmission Electron Microscope.

44 The N<sub>2</sub> adsorption–desorption isotherms were measured on Micromeritics ASAP 2460 at  
45 77 K.

46 ***Electrochemical measurements:*** The electrochemical measurements were conducted  
47 using a coin cell (CR2032) with lithium metal as the anode. The cathode slurry was  
48 fabricated by mixing the V<sub>2</sub>O<sub>5</sub> products, acetylene black and polyvinylidene fluoride  
49 (PVDF) in a weight ratio of 7:2:1 in N-methyl-2-pyrrolidone (NMP) solution. Then the  
50 slurry was coated on the aluminum foil and dried in vacuum at 110°C overnight. Finally,  
51 the coin cells were assembled in an Ar-filled glove box using a 1 M LiPF<sub>6</sub> in a 1:1:1  
52 (vol.%) mixture of ethylene carbonate, dimethyl carbonate and diethyl carbonate as  
53 electrolyte. The cyclic voltammetry (CV) curves were obtained on a ZAHNER-IM6ex  
54 electrochemical workstation at a rate of 0.1 mV/s in the voltage range of 2.5-4 V (vs.  
55 Li/Li<sup>+</sup>). The galvanostatic charge/discharge performances of the electrodes were measured  
56 at room temperature using a Land Battery tester (Land CT 2001 A, Wuhan, China). The  
57 loading mass of the active materials in the electrodes were about 0.6 to 0.7 mg/cm<sup>2</sup>.

58

59

60

61

62

63

64

65

66

67 **Figures and Captions**

68

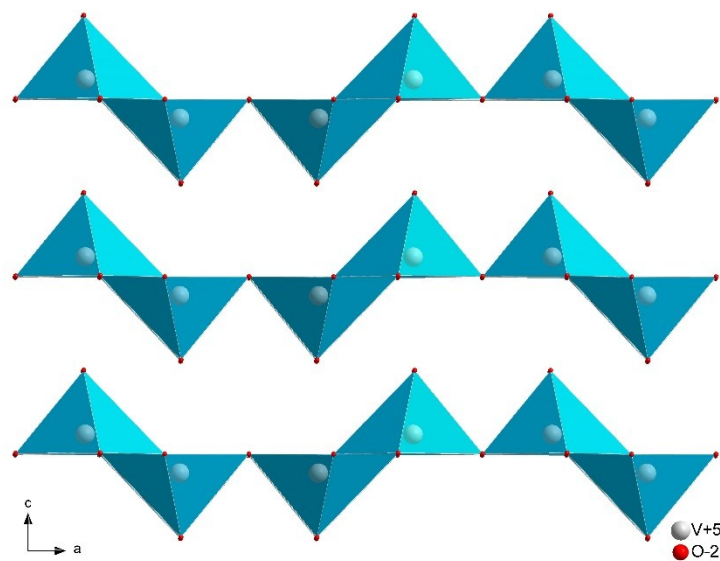

69

70 **Fig. S1.** Crystal structure projection of  $V_2O_5$  along the  $[010]$  direction.

71

72

73

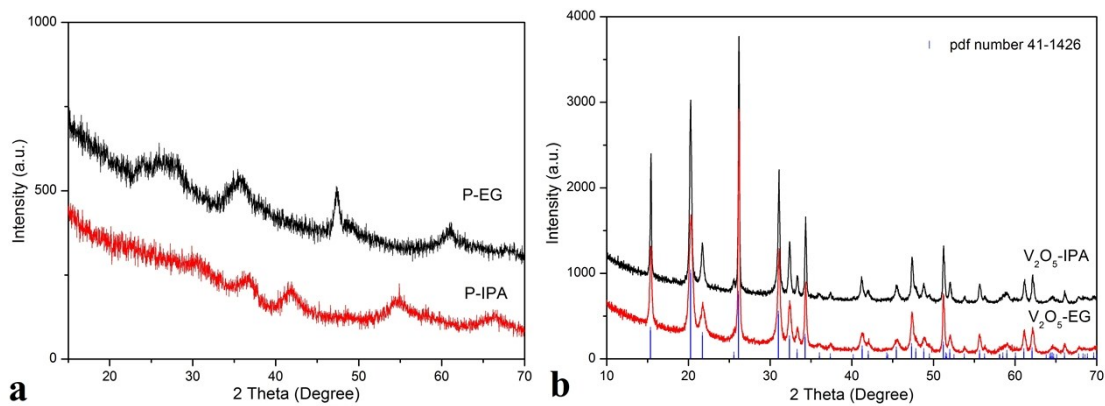

74

75 **Fig. S2.** XRD patterns of the precursors (a) obtained from IPA and EG solvents and the

76 final products after calcination (b).

77

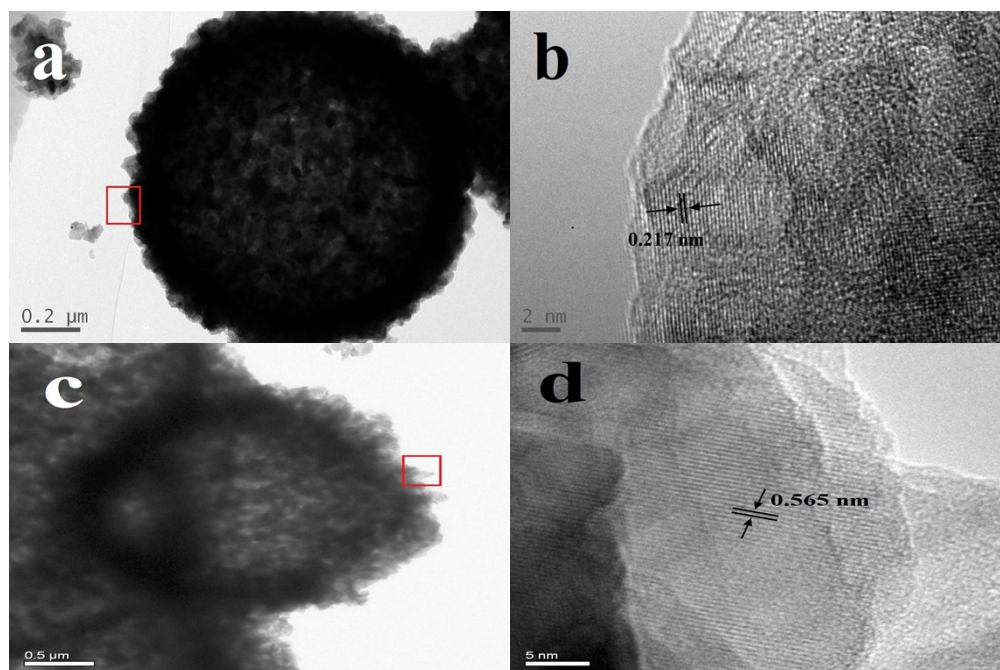

78

79

80

81 **Fig. S3.** TEM and HRTEM images of the V<sub>2</sub>O<sub>5</sub>-IPA (a and b) and V<sub>2</sub>O<sub>5</sub>-EG (c and d)

82 microspheres.

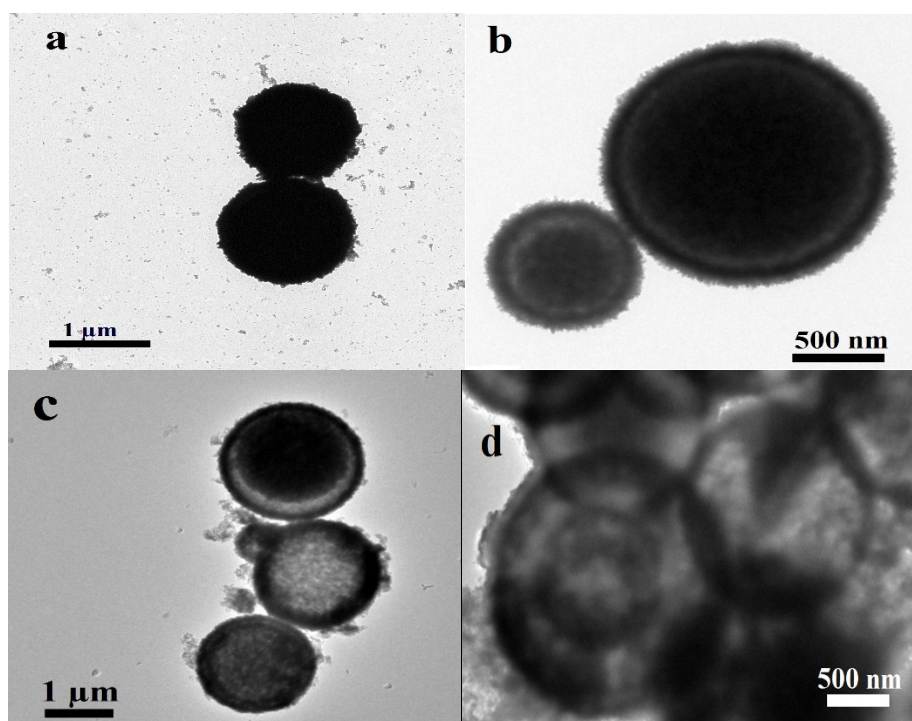

83

84

85

86 **Fig. S4.** TEM images of the as-prepared precursors in IPA at different reaction times: (a)

87 6 h, (b) 12 h, (c) 18 h and (d) 24 h.

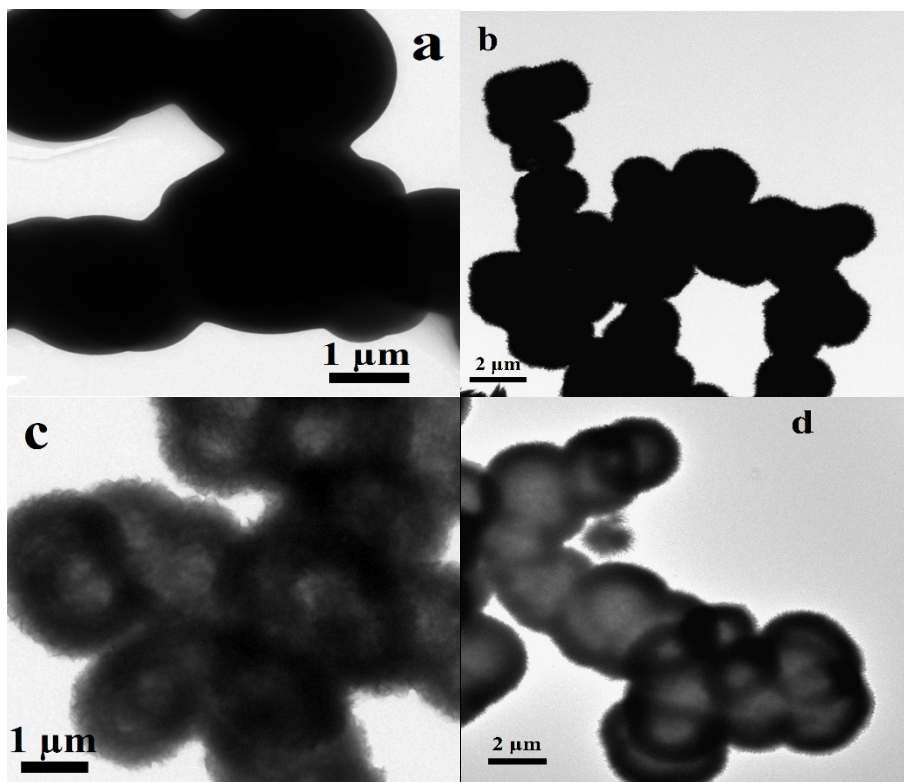

88

89

90

91 **Fig. S5.** TEM images of the as-prepared precursors in EG at different reaction times: (a)

92 6 h, (b) 12 h, (c) 20 h and (d) 24 h.

93

94

95

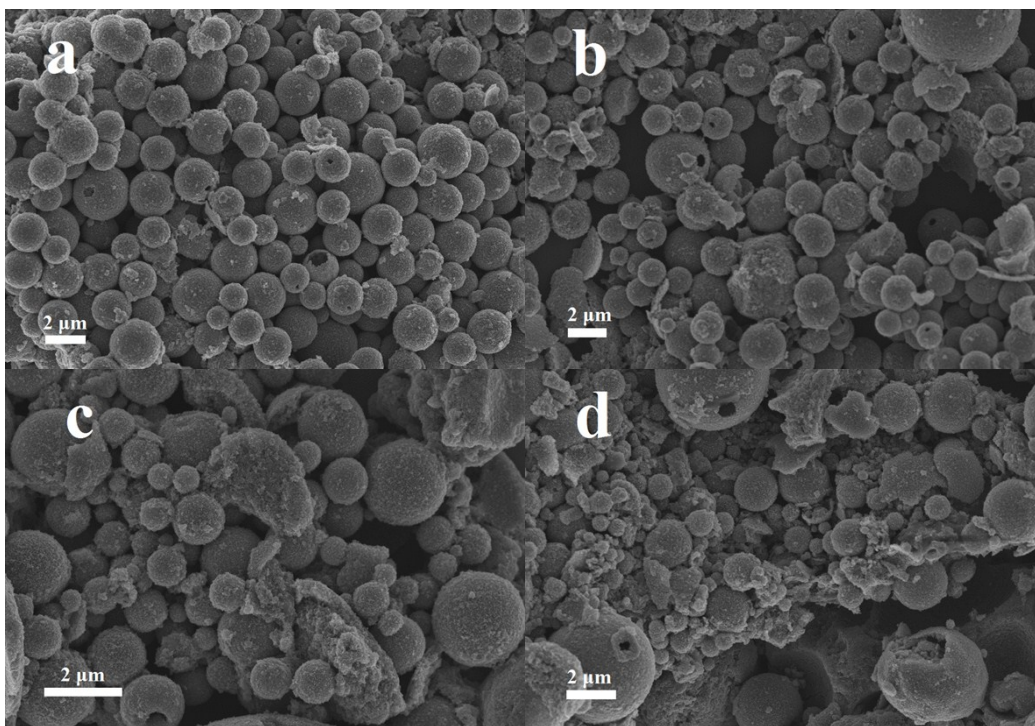

96

97

98 **Fig. S6.** SEM images of the precursors prepared from 5 ml of  $\text{VO}(\text{C}_6\text{H}_6\text{O}_7)$  solution with  
99 concentrations of 0.264 M (a), 0.165 M (b), 0.11 M (c), and 0.066 M (d) in isopropanol.

100

101

102



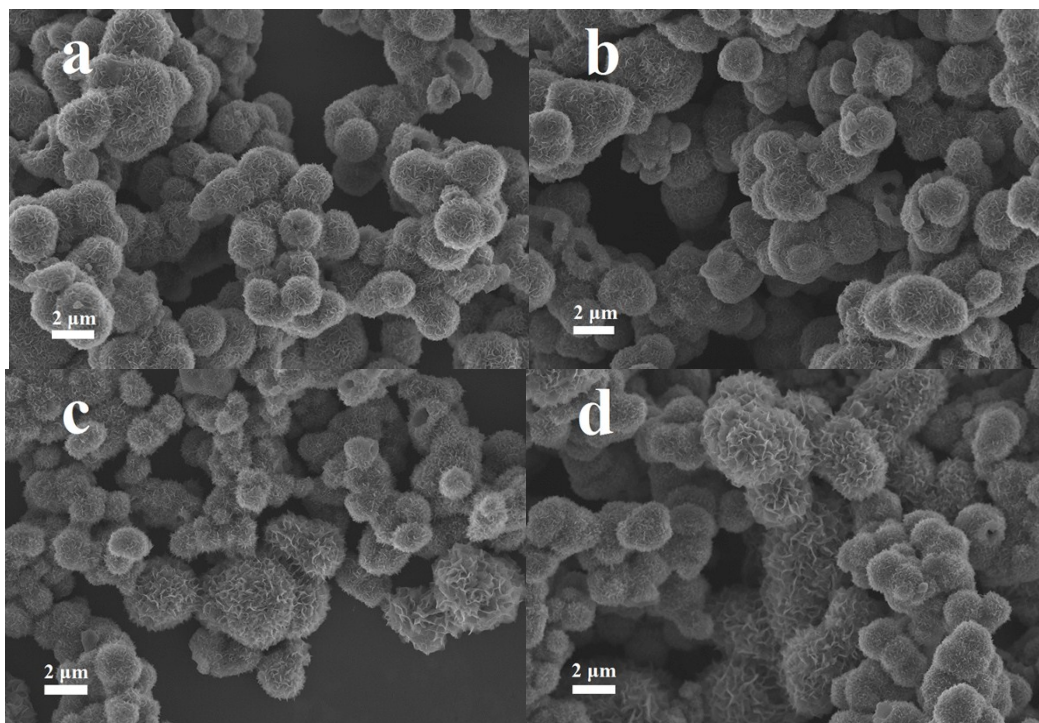

103

104

105 **Fig. S7.** SEM images of the precursors prepared from 5 ml of  $\text{VO}(\text{C}_6\text{H}_6\text{O}_7)$  solution with  
106 concentrations of 0.264 M (a), 0.165 M (b), 0.11 M (c), and 0.066 M (d) in ethylene  
107 glycol.

108

109



110

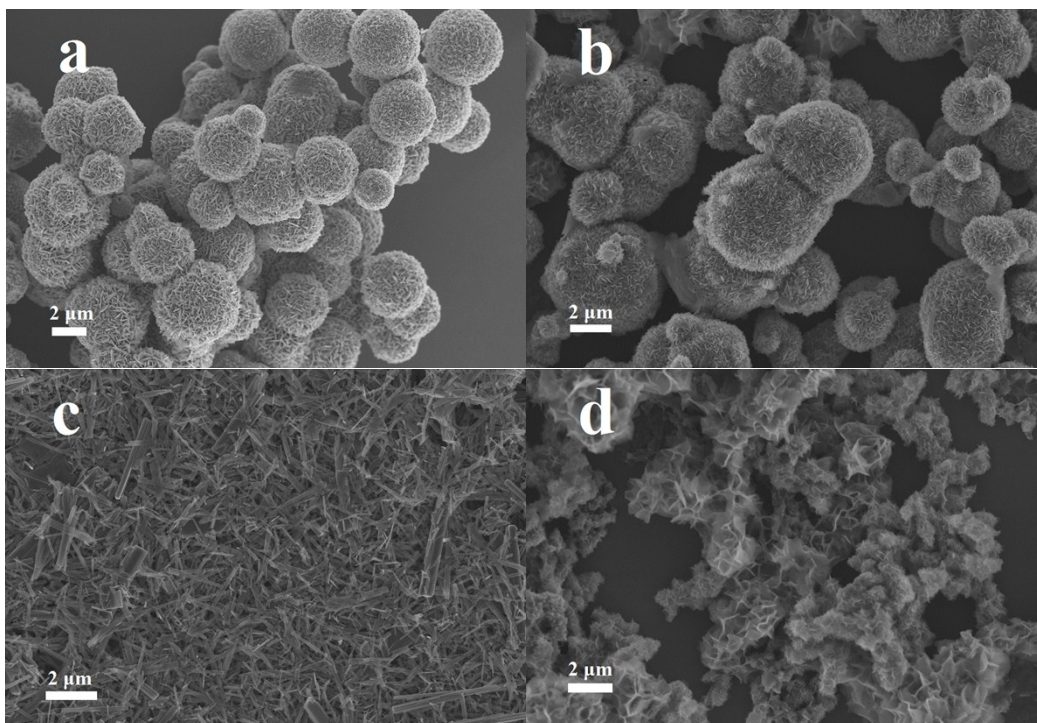

111

112 **Fig. S8.** SEM images of the precursors prepared from VO(C<sub>2</sub>O<sub>4</sub>) and V<sub>2</sub>O<sub>5</sub> sol solution in  
113 isopropanol (a and c) and ethylene glycol (b and d), respectively.

114

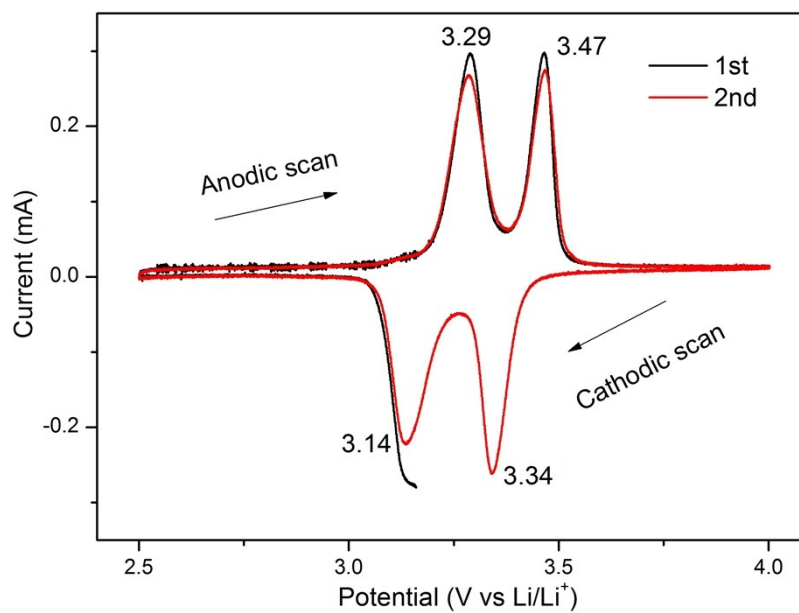

115

116 **Fig. S9.** CV curves of V<sub>2</sub>O<sub>5</sub>-EG electrode.

117

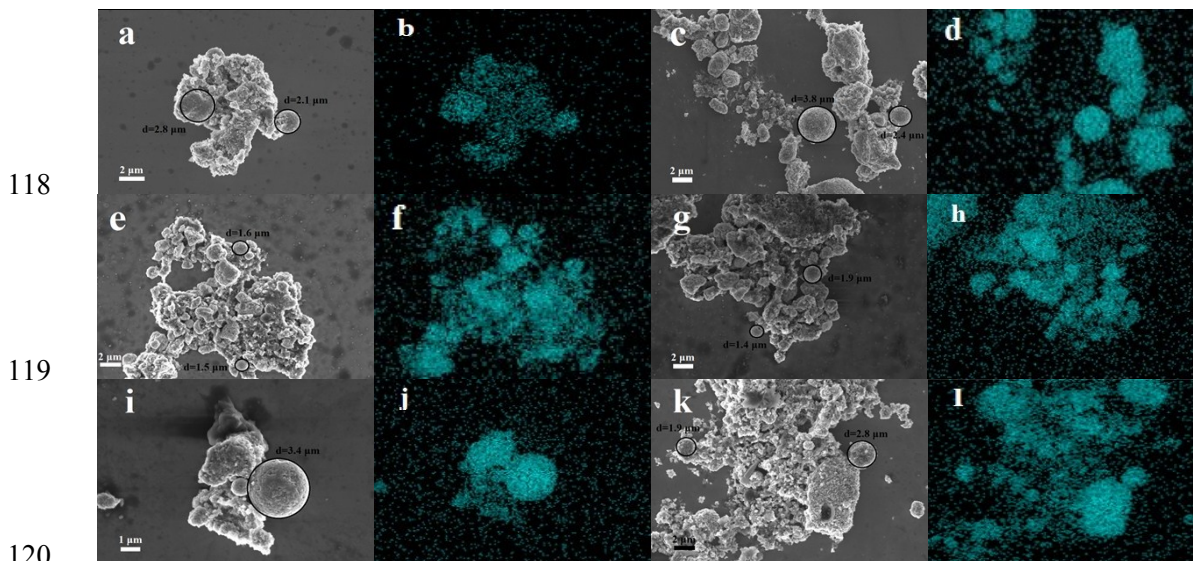

122 **Fig. S10.** SEM images and corresponding elemental mapping of V for  $V_2O_5$ -IPA

123 electrodes under different charge/discharge states (from OCV (a and b) to 3.25 V (c and

124 d), 2.5 V (e and f), then to 3.35 V (g and h) and 4 V (i and j)) or after 300 cycles (k and l).

125

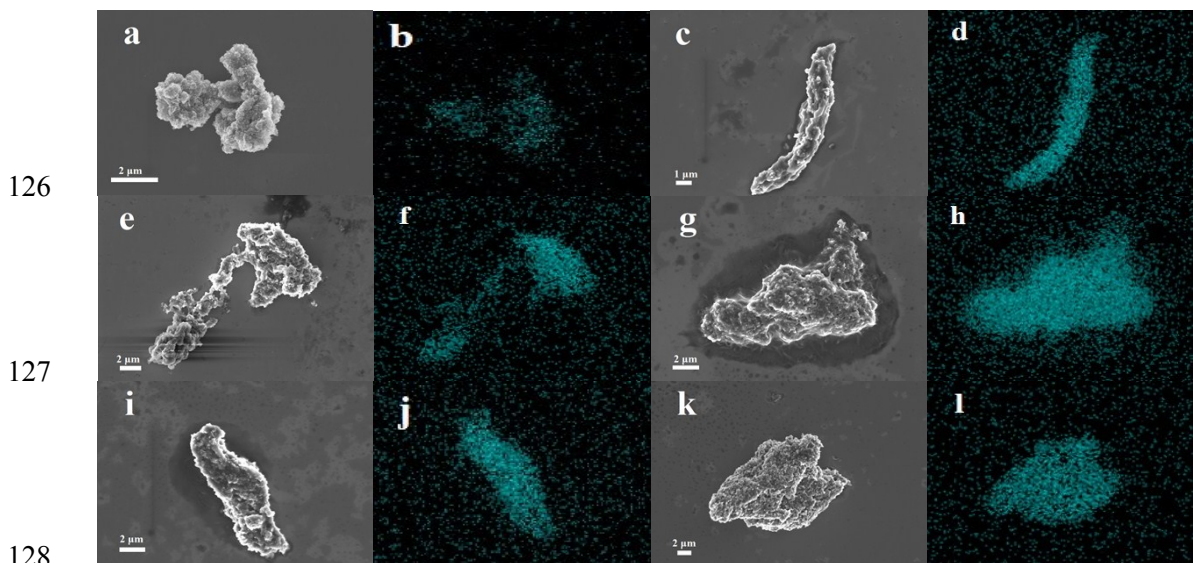

130 **Fig. S11.** SEM images and corresponding elemental mapping of V for  $V_2O_5$ -EG

131 electrodes under different charge/discharge states (from OCV (a and b) to 3.25 V (c and

132 d), 2.5 V (e and f), then to 3.35 V (g and h) and 4 V (i and j)) or after 300 cycles (k and l).

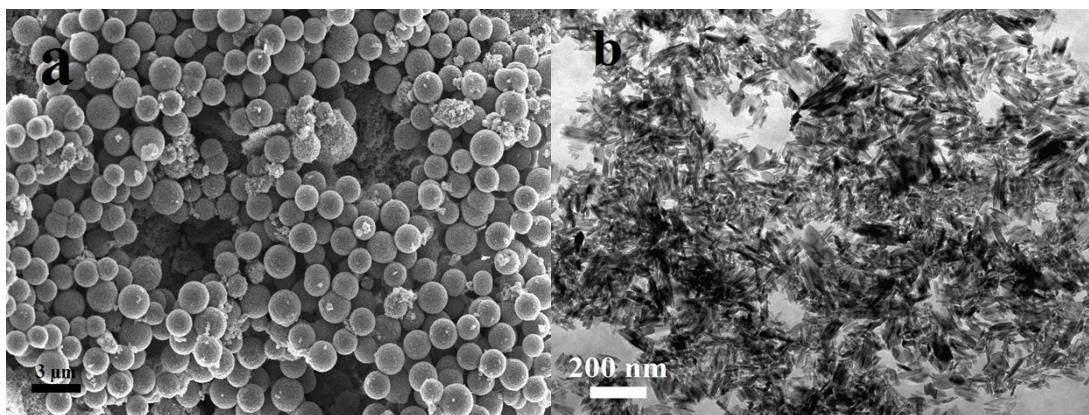

133

134 **Fig. S12.** the  $V_2O_5$ -IPA (a) and  $V_2O_5$ -EG (b) microspheres after dispersing in ethanol for  
 135 one month, respectively.

136

137

138

139

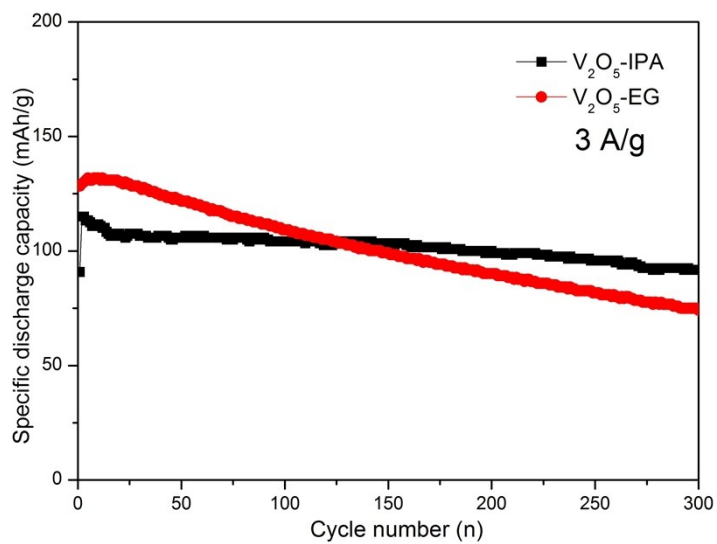

140

141 **Fig. S13.** Cycling performance of  $V_2O_5$ -IPA and  $V_2O_5$ -EG electrodes at 3 A/g.

142

143



144 **Table and Caption**145 **Table S1** The cycling performance of the reported V<sub>2</sub>O<sub>5</sub> electrodes

| Materials                                            | Voltage range | Current density | Initial or maximum capacity (mAh/g) | Capacity (mAh/g) (cycle number) |
|------------------------------------------------------|---------------|-----------------|-------------------------------------|---------------------------------|
| Rigid hollow microspheres <sup>a</sup>               | 2.5-4 V       | 1000 mA/g       | 128                                 | 118 (500)                       |
| Nanosheet-assembled hollow microspheres <sup>a</sup> |               | 3000 mA/g       | 115                                 | 92 (300)                        |
| Ultra-large nanosheets <sup>4</sup>                  | 2.5-4 V       | 300 mA/g        | 135                                 | 127 (200)                       |
| 3D porous hierarchical octahedrons <sup>5</sup>      | 2.4-4V        | 2000 mA/g       | 96                                  | 93 (500)                        |
| 3D Interconnected Nanonetwork <sup>6</sup>           | 2.4-4 V       | 1000 mA/g       | 110                                 | 106 (1000)                      |
| Hollow microflowers <sup>7</sup>                     | 2.5-4 V       | 300 mA/g        | 140                                 | 120 (100)                       |
| Nanosheet-assembled hollow microspheres <sup>8</sup> | 2.5-4 V       | 300 mA/g        | 137                                 | 128 (50)                        |
| Nanorod-assembled hollow microspheres <sup>9</sup>   | 2.5-4 V       | 294 mA/g        | 143                                 | 128.8 (200)                     |
| 3D porous hierarchical microplates <sup>10</sup>     | 2.4-4 V       | 1000 mA/g       | 130                                 | 123 (100)                       |

146 a: this work

147

148

149

150

151

152

153

154

155 **References**

- 156 1. N. V. Landschoot, E. M. Kelder and J. Schoonman, *J. Solid State Electrochem.*, 2003,  
157 **8**, 28-33.
- 158 2. S. Liang, Y. Yu, T. Chen, A. Pan, S. Zhang, J. Zhou, Y. Tang and X. Tan, *Mater.*  
159 *Lett.*, 2013, **109**, 92-95.
- 160 3. A. Pan, H. B. Wu, L. Yu and X. W. Lou, *Angew. Chem. Int. Ed.*, 2013, **52**, 2226-  
161 2230.
- 162 4. S. Liang, Y. Hu, Z. Nie, H. Huang, T. Chen, A. Pan and G. Cao, *Nano Energy*, 2015,  
163 **13**, 58-66.
- 164 5. Q. Y. An, P. F. Zhang, F. Y. Xiong, Q. L. Wei, J. Z. Sheng, Q. Q. Wang and L. Q.  
165 Mai, *Nano Res.*, 2015, **8**, 481-490.
- 166 6. Q. Y. An, Q. L. Wei, P. F. Zhang, J. Z. Sheng, K. M. Hercule, F. Lv, Q. Q. Wang, X.  
167 J. Wei and L. Q. Mai, *Small*, 2015, **11**, 2654-2660.
- 168 7. A. Q. Pan, H. B. Wu, L. Zhang and X. W. Lou, *Energ Environ. Sci.*, 2013, **6**, 1476-  
169 1479.
- 170 8. A. Q. Pan, T. Zhu, H. B. Wu and X. W. Lou, *Chem. Eur. J.*, 2013, **19**, 493-499.
- 171 9. Q. Yue, H. Jiang, Y. Hu, G. Jia and C. Li, *Chem. Commun.*, 2014, **50**, 13362-13365.
- 172 10. Q. An, P. Zhang, Q. Wei, L. He, F. Xiong, J. Sheng, Q. Wang and L. Mai, *J. Mater.*  
173 *Chem. A*, 2014, **2**, 3297-3302.
